# Supplementary material for: Insurance Status and Continuity for Young Adults With First-Episode Psychosis
Source: Atypon-hosted journal article supplement (doi:10.1176/appi.ps.201900571), 2021-05-11

**Online Supplemental Material**

| Appendix Table 1. Comparing RAISE-ETP Sample with and without 12-, 15-, or 18-month Insurance Data |                              |       |                                                             |       |                                       |
|----------------------------------------------------------------------------------------------------|------------------------------|-------|-------------------------------------------------------------|-------|---------------------------------------|
|                                                                                                    | Main analytic sample (N=288) |       | Sample without 12-, 15-, or 18-month insurance data (N=113) |       | p-value for difference across samples |
|                                                                                                    | N                            | Col % | N                                                           | Col % |                                       |
| <u>Sociodemographic Characteristics</u>                                                            |                              |       |                                                             |       |                                       |
| Age                                                                                                |                              |       |                                                             |       | 0.040                                 |
| 15-17                                                                                              | 17                           | 6%    | 5                                                           | 4%    |                                       |
| 18-23                                                                                              | 156                          | 54%   | 76                                                          | 67%   |                                       |
| 24-25                                                                                              | 35                           | 12%   | 7                                                           | 6%    |                                       |
| 26-28                                                                                              | 29                           | 10%   | 15                                                          | 13%   |                                       |
| 29-32                                                                                              | 32                           | 11%   | 4                                                           | 4%    |                                       |
| 33 or above                                                                                        | 19                           | 7%    | 6                                                           | 5%    |                                       |
|                                                                                                    |                              |       |                                                             |       |                                       |
| Gender                                                                                             |                              |       |                                                             |       | 0.135                                 |
| Male                                                                                               | 215                          | 75%   | 76                                                          | 67%   |                                       |
| Female                                                                                             | 73                           | 25%   | 37                                                          | 33%   |                                       |
|                                                                                                    |                              |       |                                                             |       |                                       |
| Race                                                                                               |                              |       |                                                             |       | 0.274                                 |
| Non-Hispanic White                                                                                 | 133                          | 46%   | 40                                                          | 35%   |                                       |
| Non-Hispanic Black                                                                                 | 93                           | 32%   | 43                                                          | 38%   |                                       |
| Hispanic/Latino                                                                                    | 49                           | 17%   | 24                                                          | 21%   |                                       |
| Other                                                                                              | 13                           | 5%    | 6                                                           | 5%    |                                       |
|                                                                                                    |                              |       |                                                             |       |                                       |
| Mother's education                                                                                 |                              |       |                                                             |       | 0.375                                 |
| Some college or higher                                                                             | 125                          | 43%   | 41                                                          | 36%   |                                       |
| Completed high school                                                                              | 76                           | 26%   | 35                                                          | 31%   |                                       |
| Some high school                                                                                   | 38                           | 13%   | 20                                                          | 18%   |                                       |
| Some or completed grade school                                                                     | 50                           | 17%   | 17                                                          | 15%   |                                       |
|                                                                                                    |                              |       |                                                             |       |                                       |
| Whether a student or working                                                                       |                              |       |                                                             |       | 0.853                                 |
| No                                                                                                 | 199                          | 69%   | 77                                                          | 68%   |                                       |
| Yes                                                                                                | 89                           | 31%   | 36                                                          | 32%   |                                       |

|                                 |       |         |       |       |       |
|---------------------------------|-------|---------|-------|-------|-------|
| Disability at baseline          |       |         |       |       | 0.882 |
| No                              | 260   | 91%     | 102   | 91%   |       |
| Yes                             | 27    | 9%      | 10    | 9%    |       |
| <u>Clinical Characteristics</u> |       |         |       |       |       |
| DUP                             |       |         |       |       | 0.317 |
| DUP < 74                        | 148   | 52%     | 52    | 46%   |       |
| DUP >= 74                       | 139   | 48%     | 61    | 54%   |       |
| <u>PANSS: Mean (SD)</u>         |       |         |       |       |       |
|                                 | 76.05 | (14.72) | 78.13 | 15.86 | 0.214 |
| <u>QLS: Mean (SD)</u>           |       |         |       |       |       |
|                                 | 53.14 | (19.28) | 51.42 | 17.28 | 0.410 |
| <u>Experimental Group</u>       |       |         |       |       |       |
| Community Care                  | 119   | 41%     | 62    | 55%   |       |
| NAVIGATE                        | 169   | 59%     | 51    | 45%   |       |

Note: The sample without 12-, 15-, or 18-month insurance data (N=113) excludes three RAISE-ETP observations that did not have a valid baseline insurance measure. Possible scores of the Positive and Negative Symptoms Scale (PANSS) range from 30 to 210, with higher scores indicating worse symptoms. Possible scores of the Quality of Life Scale (QLS) range from 0 to 126, with higher scores indicating better quality of life.

| Appendix Table 2. Predictors of Uninsurance at any Point over the 12 Month Study Period Among those with Insurance at Baseline                                                                                                                                                                                                                 |                                                      |        |       |         |
|------------------------------------------------------------------------------------------------------------------------------------------------------------------------------------------------------------------------------------------------------------------------------------------------------------------------------------------------|------------------------------------------------------|--------|-------|---------|
|                                                                                                                                                                                                                                                                                                                                                | Incremental Change in the Probability of Uninsurance | 95% CI |       | P-Value |
| NAVIGATE group                                                                                                                                                                                                                                                                                                                                 | -0.04                                                | -0.17  | 0.09  | 0.551   |
| Age at baseline                                                                                                                                                                                                                                                                                                                                |                                                      |        |       |         |
| 15 to 17                                                                                                                                                                                                                                                                                                                                       | 0.01                                                 | -0.28  | 0.30  | 0.948   |
| 18 to 23 (ref.)                                                                                                                                                                                                                                                                                                                                |                                                      |        |       |         |
| 24 to 25                                                                                                                                                                                                                                                                                                                                       | 0.33                                                 | 0.08   | 0.58  | 0.010   |
| 26 to 28                                                                                                                                                                                                                                                                                                                                       | 0.09                                                 | -0.21  | 0.38  | 0.565   |
| 29 to 32                                                                                                                                                                                                                                                                                                                                       | -0.16                                                | -0.30  | -0.03 | 0.013   |
| 33 and above                                                                                                                                                                                                                                                                                                                                   |                                                      |        |       |         |
| Female                                                                                                                                                                                                                                                                                                                                         | -0.03                                                | -0.18  | 0.12  | 0.696   |
| Male (ref.)                                                                                                                                                                                                                                                                                                                                    |                                                      |        |       |         |
| Non-Hispanic Black                                                                                                                                                                                                                                                                                                                             | 0.04                                                 | -0.11  | 0.18  | 0.634   |
| Hispanic/Latino                                                                                                                                                                                                                                                                                                                                | 0.13                                                 | -0.11  | 0.36  | 0.294   |
| Other                                                                                                                                                                                                                                                                                                                                          | 0.28                                                 | -0.02  | 0.59  | 0.066   |
| Non-Hispanic White (ref.)                                                                                                                                                                                                                                                                                                                      |                                                      |        |       |         |
| Mother's Education                                                                                                                                                                                                                                                                                                                             |                                                      |        |       |         |
| Some college or higher                                                                                                                                                                                                                                                                                                                         | -0.05                                                | -0.23  | 0.13  | 0.570   |
| Completed high school                                                                                                                                                                                                                                                                                                                          | 0.16                                                 | -0.04  | 0.36  | 0.115   |
| Some high school or grade school                                                                                                                                                                                                                                                                                                               | -0.11                                                | -0.32  | 0.10  | 0.321   |
| No school or unknown (ref.)                                                                                                                                                                                                                                                                                                                    |                                                      |        |       |         |
| Whether a student or working                                                                                                                                                                                                                                                                                                                   | -0.13                                                | -0.29  | 0.03  | 0.104   |
| DUP                                                                                                                                                                                                                                                                                                                                            | 0.12                                                 | -0.01  | 0.25  | 0.077   |
| PANSS                                                                                                                                                                                                                                                                                                                                          | 0.003                                                | -0.003 | 0.01  | 0.327   |
| QLS                                                                                                                                                                                                                                                                                                                                            | -0.001                                               | -0.01  | 0.004 | 0.623   |
| Disability at baseline                                                                                                                                                                                                                                                                                                                         | -0.11                                                | -0.29  | 0.07  | 0.244   |
| N                                                                                                                                                                                                                                                                                                                                              | 153                                                  |        |       |         |
| Pseudo R <sup>2</sup>                                                                                                                                                                                                                                                                                                                          | 0.235                                                |        |       |         |
| Notes: Data from the RAISE-ETP respondents with baseline and 12-month follow-up insurance status data (details in text). Incremental changes in the probability of baseline uninsurance and the associated confidence intervals and p-values were calculated from logistic regression estimates using the Margins command in Stata Version 15. |                                                      |        |       |         |

| Appendix Table 3. Predictors of Any Uninsurance at any Point over the 12 Month Study Period                                                                                                                                                                                                                                                    |                                                      |        |        |         |
|------------------------------------------------------------------------------------------------------------------------------------------------------------------------------------------------------------------------------------------------------------------------------------------------------------------------------------------------|------------------------------------------------------|--------|--------|---------|
|                                                                                                                                                                                                                                                                                                                                                | Incremental Change in the Probability of Uninsurance | 95% CI |        | P-Value |
| NAVIGATE group                                                                                                                                                                                                                                                                                                                                 | -0.11                                                | -0.22  | -0.001 | 0.049   |
| Age at baseline                                                                                                                                                                                                                                                                                                                                |                                                      |        |        |         |
| 15 to 17                                                                                                                                                                                                                                                                                                                                       | -0.01                                                | -0.24  | 0.23   | 0.954   |
| 18 to 23 (ref.)                                                                                                                                                                                                                                                                                                                                |                                                      |        |        |         |
| 24 to 25                                                                                                                                                                                                                                                                                                                                       | 0.29                                                 | 0.15   | 0.44   | <.001   |
| 26 to 28                                                                                                                                                                                                                                                                                                                                       | 0.30                                                 | 0.15   | 0.45   | <.001   |
| 29 to 32                                                                                                                                                                                                                                                                                                                                       | 0.04                                                 | -0.14  | 0.22   | 0.653   |
| 33 and above                                                                                                                                                                                                                                                                                                                                   | 0.03                                                 | -0.20  | 0.26   | 0.794   |
| Female                                                                                                                                                                                                                                                                                                                                         | 0.06                                                 | -0.06  | 0.18   | 0.351   |
| Male (ref.)                                                                                                                                                                                                                                                                                                                                    |                                                      |        |        |         |
| Non-Hispanic Black                                                                                                                                                                                                                                                                                                                             | 0.04                                                 | -0.09  | 0.16   | 0.572   |
| Hispanic/Latino                                                                                                                                                                                                                                                                                                                                | 0.24                                                 | 0.10   | 0.38   | <.001   |
| Other                                                                                                                                                                                                                                                                                                                                          | 0.18                                                 | -0.06  | 0.41   | 0.138   |
| Non-Hispanic White (ref.)                                                                                                                                                                                                                                                                                                                      |                                                      |        |        |         |
| Mother's Education                                                                                                                                                                                                                                                                                                                             |                                                      |        |        |         |
| Some college or higher                                                                                                                                                                                                                                                                                                                         | -0.04                                                | -0.20  | 0.12   | 0.635   |
| Completed high school                                                                                                                                                                                                                                                                                                                          | -0.01                                                | -0.15  | 0.18   | 0.865   |
| Some high school or grade school                                                                                                                                                                                                                                                                                                               | 0.04                                                 | -0.16  | 0.23   | 0.721   |
| No school or unknown (ref.)                                                                                                                                                                                                                                                                                                                    |                                                      |        |        |         |
| Whether a student or working                                                                                                                                                                                                                                                                                                                   | -0.08                                                | -0.20  | 0.04   | 0.191   |
| DUP                                                                                                                                                                                                                                                                                                                                            | 0.02                                                 | -0.09  | 0.12   | 0.776   |
| PANSS                                                                                                                                                                                                                                                                                                                                          | 0.002                                                | -0.002 | 0.01   | 0.403   |
| QLS                                                                                                                                                                                                                                                                                                                                            | -0.01                                                | -0.01  | -0.002 | 0.004   |
| Disability at baseline                                                                                                                                                                                                                                                                                                                         | -0.41                                                | -0.57  | -0.25  | <.001   |
| N                                                                                                                                                                                                                                                                                                                                              | 286                                                  |        |        |         |
| Pseudo R <sup>2</sup>                                                                                                                                                                                                                                                                                                                          | 0.210                                                |        |        |         |
| Notes: Data from the RAISE-ETP respondents with baseline and 12-month follow-up insurance status data (details in text). Incremental changes in the probability of baseline uninsurance and the associated confidence intervals and p-values were calculated from logistic regression estimates using the Margins command in Stata Version 15. |                                                      |        |        |         |

Appendix Figure 1. Insurance Status at Baseline and 12-Month, by RAISE-ETP Experimental Group (12-month insurance sample)

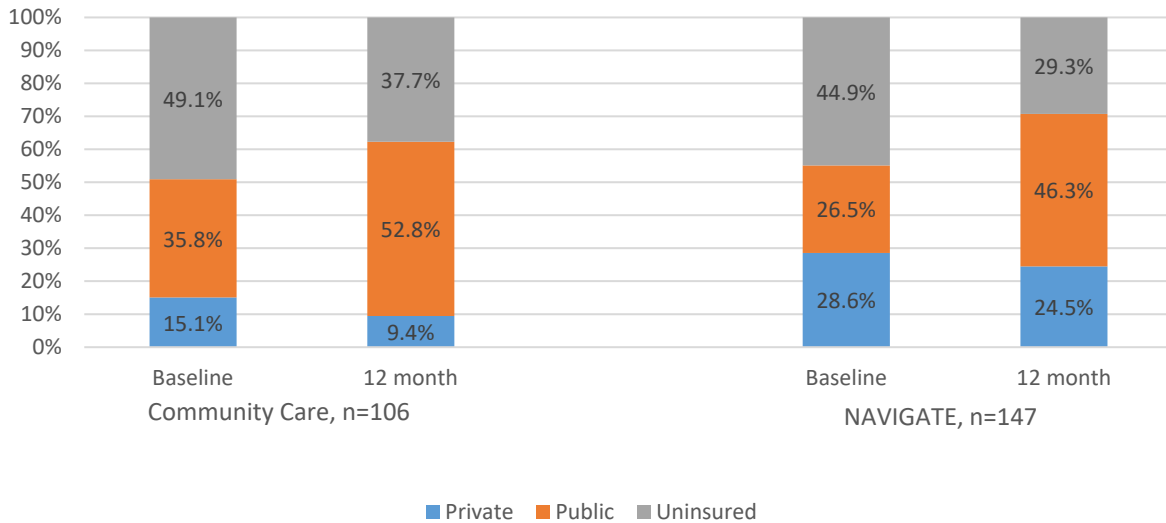

Appendix Figure 2. Insurance at Baseline and 12 months in RAISE-ETP and MEPS Samples (12-month insurance RAISE sample)

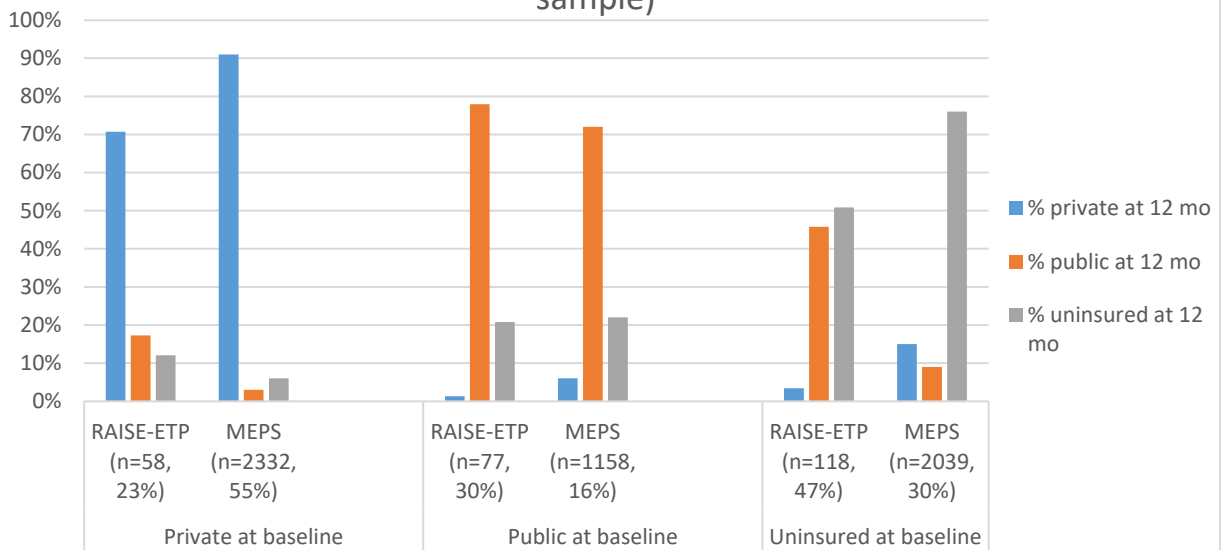

Appendix Figure 3. Insurance and Disability Transitions in RAISE-ETP Sample (12-month insurance sample)

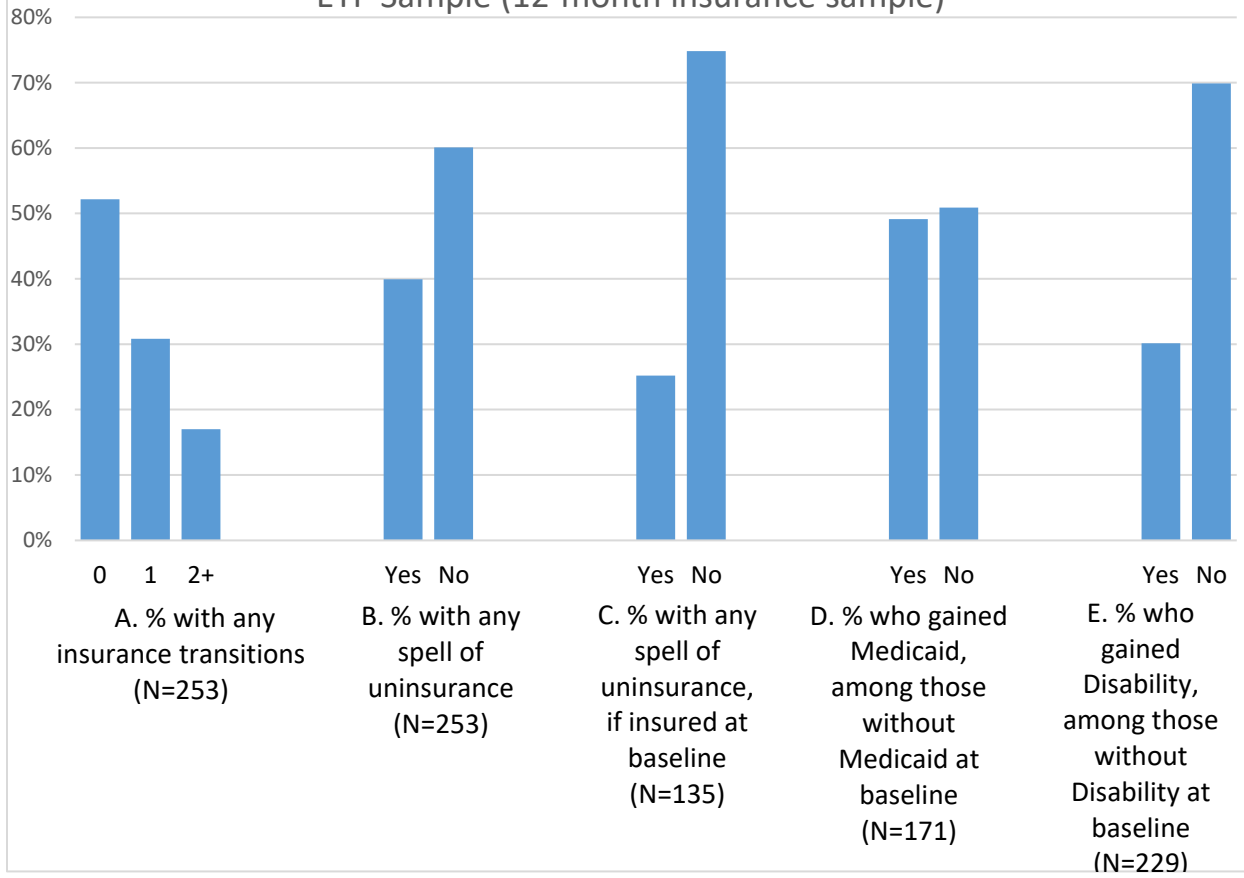

Supplement: appi.ps.201900571.ds001.pdf [file appi.ps.201900571.ds001.pdf]
